# Supplementary material for: Study on the Cellular Anti-Inflammatory Effect of Torularhodin Produced by Sporidiobolus pararoseus ZQHL Isolated from Vinegar Fungus
Source: MDPI journal article supplement (doi:10.3390/molecules28031436), 2023-02-02
Supplement: s1 [file s1]

**Table S1. Conditions in strain enrichment culture**

| Time/h              | 1-10    | 10-20     | 20-30    | 30-64   |
|---------------------|---------|-----------|----------|---------|
| Temperature /°C     | 28      | 28        | 28       | 28      |
| pH                  | 6       | 6         | 6        | 6       |
| Ventilation L/min   | 25      | 40-50     | 50       | 40      |
| Rotating speed /rpm | 200-400 | 600-800   | 600-800  | 500-700 |
| Tank pressure /Mpa  | 0.06    | 0.08-0.09 | 0.09-0.1 | 0.09    |

**Table S2. Sequences of PCR primers.**

|                | Upstream primer (5'-3') | Downstream primer (5'-3') |
|----------------|-------------------------|---------------------------|
| $\beta$ -actin | CCACAGCTGAGAGGGAAA      | AAGGAAGGCTGGAAAAGAGC      |
| TLR4           | CTGGGTGAGAAAGCTGGTAA    | AGCCTTCCTGGATGATGTTGG     |
| MyD88          | GTTGTGTGTGTCCGACCGT     | GTCAGAAACAACCACCACCATGC   |
| TNF- $\alpha$  | AGCCCCAGTCTGTATCCTT     | CATTCGAGGCTCCAGTGAAT      |
| IL-1 $\beta$   | GGGCCTCAAAGGAAAGAATC    | TACCAGTTGGGGAACTCTGC      |
| COX-2          | CCTGAGCATCTACGGTTTGC    | ACTGCTCATCACCCCATTCA      |
| iNOS           | ACCCAAGGTCTACGTTTCAGG   | CGCACATCTCCGCAAATGTA      |
